# Supplementary material for: Cycling and persistence of iron-bound organic carbon in subseafloor sediments
Source: PubMed Central journal article supplement — Nat Commun. 2024 Jul 29;15:6370. doi: 10.1038/s41467-024-50578-5 (PMC11286938; doi:10.1038/s41467-024-50578-5), 2024-07-29
Supplement: 41467_2024_50578_MOESM3_ESM.pdf [file 41467_2024_50578_MOESM3_ESM.pdf]

## **Description of Additional Supplementary Files**

File Name: Supplementary Data 1

Description: Prokaryotic 16S rRNA gene diversity at Phylum level in core QDN-G1.

File Name: Supplementary Data 2

Description: Prokaryotic 16S rRNA gene diversity at Phylum level in core QDN-14B.
